# Supplementary material for: Enhancement of LIN28B-induced hematopoietic reprogramming by IGF2BP3
Source: PubMed Central journal article supplement — Genes Dev. 2019 Aug 1;33(15-16):1048–68. doi: 10.1101/gad.325100.119 (PMC6672051; doi:10.1101/gad.325100.119), 2019-08-01
Supplement: supp_gad.325100.119_Supplemental_Material.pdf [file supp_gad.325100.119_Supplemental_Material.pdf]

# Supplemental Figures and Legends

## Supplemental Figure S1

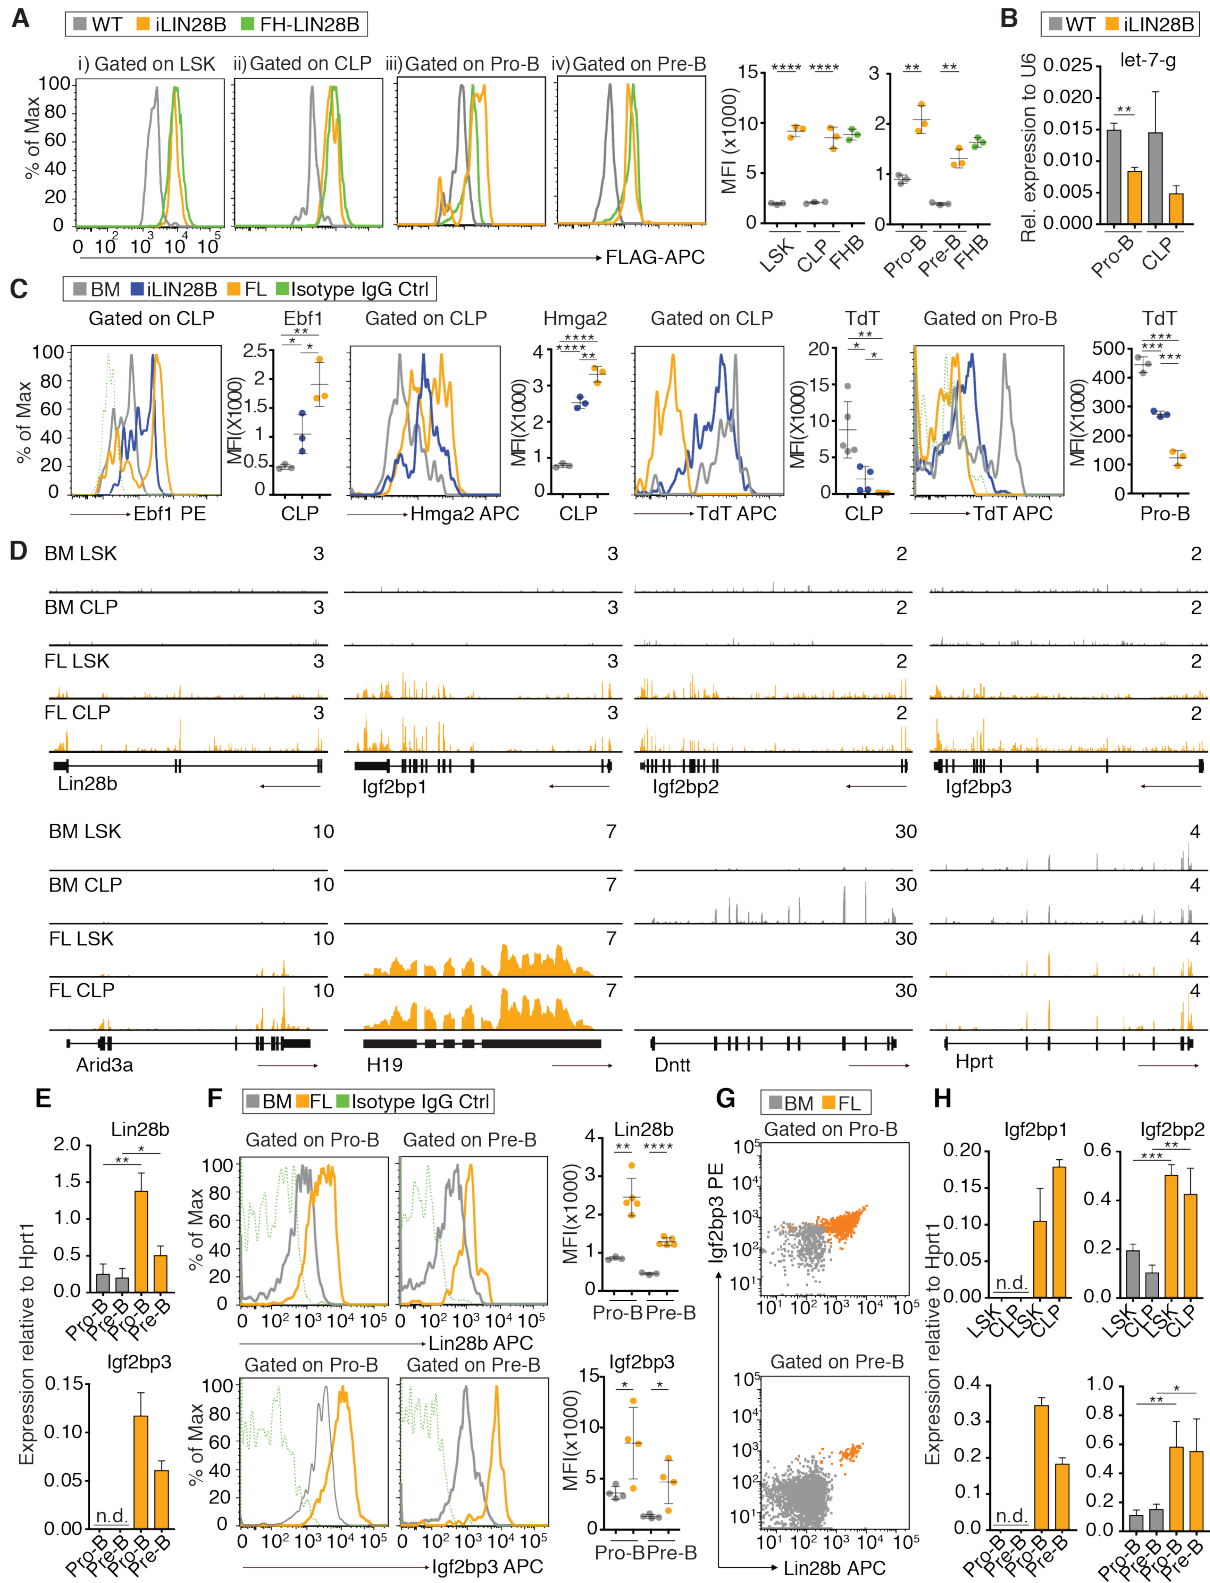

**Supplemental Figure S1.** Validation of scRNA-seq and low input RNA-seq.

**(A)** The flow cytometric histograms show FLAG epitope expression in (i) LSK, (ii) CLP, (iii) pro-B and (iv) pre-B cells from iLIN28B mouse and WT littermate control. FH-LIN28B-220-8 (FHB) cell line (green) included for comparison. The geometric mean of fluorescence intensities (MFI) from biological replicates are plotted. \*\*  $P \leq 0.01$  and \*\*\*\*  $P \leq 0.0001$  represent results of two-tailed *t*-test. Error bars represent standard deviation of three biological replicates.

**(B)** Levels of mature *let-7g* in CLP and pro-B cells from iLIN28B mouse and WT littermate control were measured using TaqMan assays and normalized to *Rnu6* (U6) snRNA. \*\*  $P \leq 0.01$  represents result of two-tailed *t*-test. Error bars represent standard deviation of three biological replicates.

**(C)** The flow cytometric histograms show Ebf1, Hmga2 and TdT protein expression in CLP or pro-B (*right panel*, for TdT) cells from BM of wildtype (gray), iLIN28B mouse (blue) and E16.5 fetal liver (orange). Isotype IgG controls are also shown (green, dashed). The MFI from biological replicates are plotted. \*  $P \leq 0.05$ , \*\*  $P \leq 0.01$ , \*\*\*  $P \leq 0.001$  and \*\*\*\*  $P \leq 0.0001$  represent results of two-tailed *t*-test. Error bars represent standard deviation of three to five biological replicates.

**(D)** The genome browser tracks of indicated genes show coverage tracks for low-input RNA-seq described in Fig. 1C. *Dntt* is included as a known example of a transcript expressed in adult BM CLPs but not in FL.

**(E)** The RT-qPCR analyses quantify *Lin28b* and *Igf2bp3* mRNA expression normalized to *Hprt1* in pro-B and pre-B cells sorted from FL (orange) or BM (gray). n.d. indicates not detectable. \*  $P \leq 0.05$ , and \*\*  $P \leq 0.01$  represent results of two-tailed *t*-test. Error bars represent standard deviation of three biological replicates.

**(F)** The flow cytometric histograms show *Lin28b* and *Igf2bp3* expression in pro-B and pre-B cells from BM (gray) and FL (orange). Isotype IgG controls are also shown (green, dashed). The geometric mean of fluorescence intensities (MFI) from biological replicates are plotted. \*  $P \leq 0.05$ , \*\*  $P \leq 0.01$ , and \*\*\*\*  $P \leq 0.0001$  represent results of two-tailed *t*-test. Error bars represent standard deviation of three to five biological replicates.

**(G)** The dot plots quantify *Lin28b* (x-axis) and *Igf2bp3* (y-axis) protein co-expression in pro-B and pre-B cells from BM and FL based on FACS. Dots represent individual cells color coded by sample.

**(H)** The RT-qPCR analyses quantify *Igf2bp1* and *Igf2bp2* mRNA expression normalized to *Hprt1* in LSK, CLP, pro-B and pre-B cells sorted from FL (orange) or BM (gray). n.d. indicates not detectable. \*  $P \leq 0.05$ , \*\*  $P \leq 0.01$  and \*\*\*  $P \leq 0.001$  represent results of two-tailed *t*-test. Error bars represent standard deviation of three biological replicates.

## Supplemental Figure S2

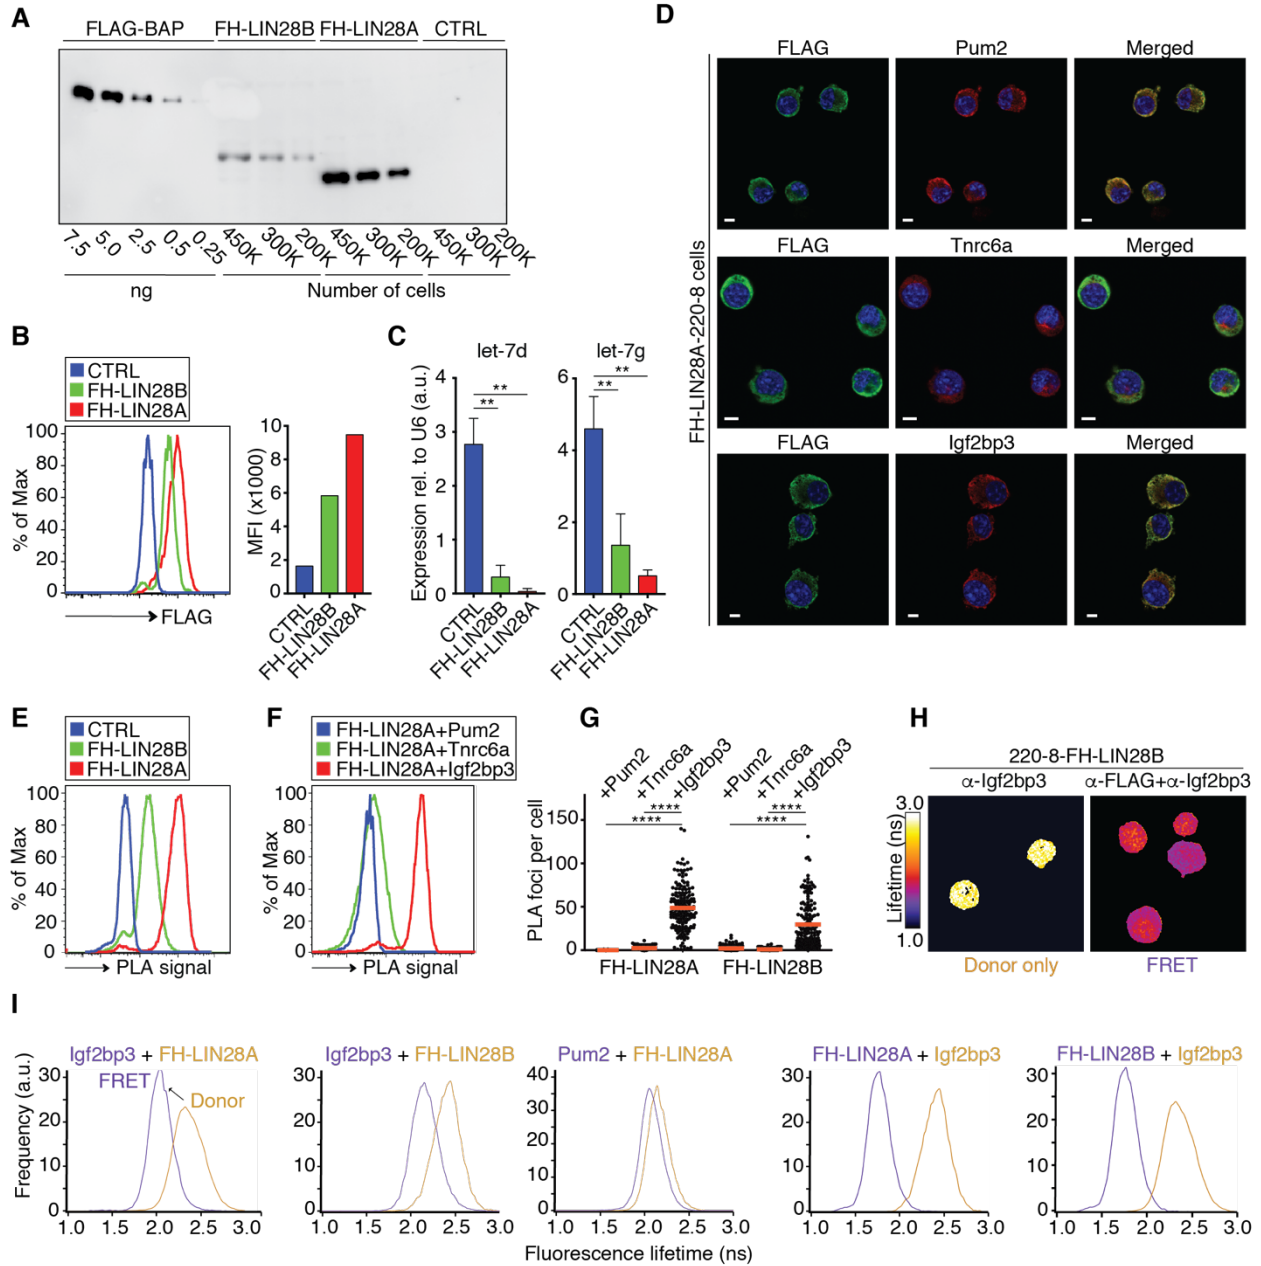

**Supplemental Figure S2.** LIN28A and LIN28B are in close proximity to Igf2bp3 *in situ*.

**(A)** Lysates from different cell numbers were loaded for semi-quantitative Western analysis to estimate the copy number of FH-LIN28A and FH-LIN28B molecules per cell. Serial dilutions of recombinant FLAG-BAP protein (0.25 – 7.5 ng) were used as a standard for quantitation of signal from anti-FLAG detection.

**(B)** The flow cytometric histograms show FLAG epitope expression in wild-type 220-8 cells and transgenic 220-8 cells stably expressing FH-LIN28A or B (*left panel*). Mean fluorescence intensities are plotted (*right panel*).

**(C)** Levels of mature let-7d and let-7g in absence or presence FH-LIN28A or -B were measured using TaqMan assays and normalized to *Rnu6* (U6) snRNA. \*\*  $P \leq 0.01$  represent results of two-tailed *t*-test. Error bars represent standard deviation of three biological replicates.

**(D)** Representative confocal images show immunofluorescence staining in FH-LIN28A-220-8 cells using indicated primary antibodies: anti-FLAG, anti-Igf2bp3, anti-Pum2, and anti-Tnrc6a. Secondary antibodies were anti-mouse Alexa488 and anti-rabbit Alexa555. Nuclei were stained with DAPI. Scale Bar = 5 $\mu$ m.

**(E)** Histograms show flow cytometric quantification of PLA signal in wild-type 220-8 cells and transgenic 220-8 cells expressing FH-LIN28A or B, indicating proximity between Igf2bp3 and FLAG epitopes.

**(F)** Histograms show flow cytometric quantification of PLA signal in wild-type 220-8 cells and transgenic 220-8 cells expressing FH-LIN28A, comparing proximity between FLAG epitopes and Igf2bp3, Pum2, or Tnrc6a, respectively. Pum2 and Tnrc6a serve as specificity controls.

**(G)** Single cell PLA foci count in 220-8 cells transduced with either FH-LIN28A or FH-LIN28B are plotted to compare as in Supplemental Fig. S2F. Each dot in the graph represents a single cell with the number of PLA foci in that cell. The red bar indicates median foci number within each population. \*\*\*\*  $P \leq 0.0001$  by Mann-Whitney Test.

**(H)** The representative microscopy images show fluorescence lifetime for FH-LIN28A and Igf2bp3 in FH-LIN28A-220-8 cells as determined by FLIM-FRET assay. Fluorescence lifetime of immunostaining with anti-Igf2bp3 conjugated to Alexa 488 dye only (*left panel*, donor only), or co-stained with anti-FLAG conjugated to Alexa 555 (*right panel*, FRET). The color scale indicates fluorescence lifetime (ns).

**(I)** The histograms depict reciprocal FLIM-FRET of FH-LIN28/Igf2bp3 pair in FH-LIN28A and FH-LIN28B-220-8 cells. In each sample, the donor antibody is indicated in orange. The FLAG/Pum2 pair represents a non-interacting protein pair in FH-LIN28A-220-8 cells and was used as negative control.

### Supplemental Figure S3

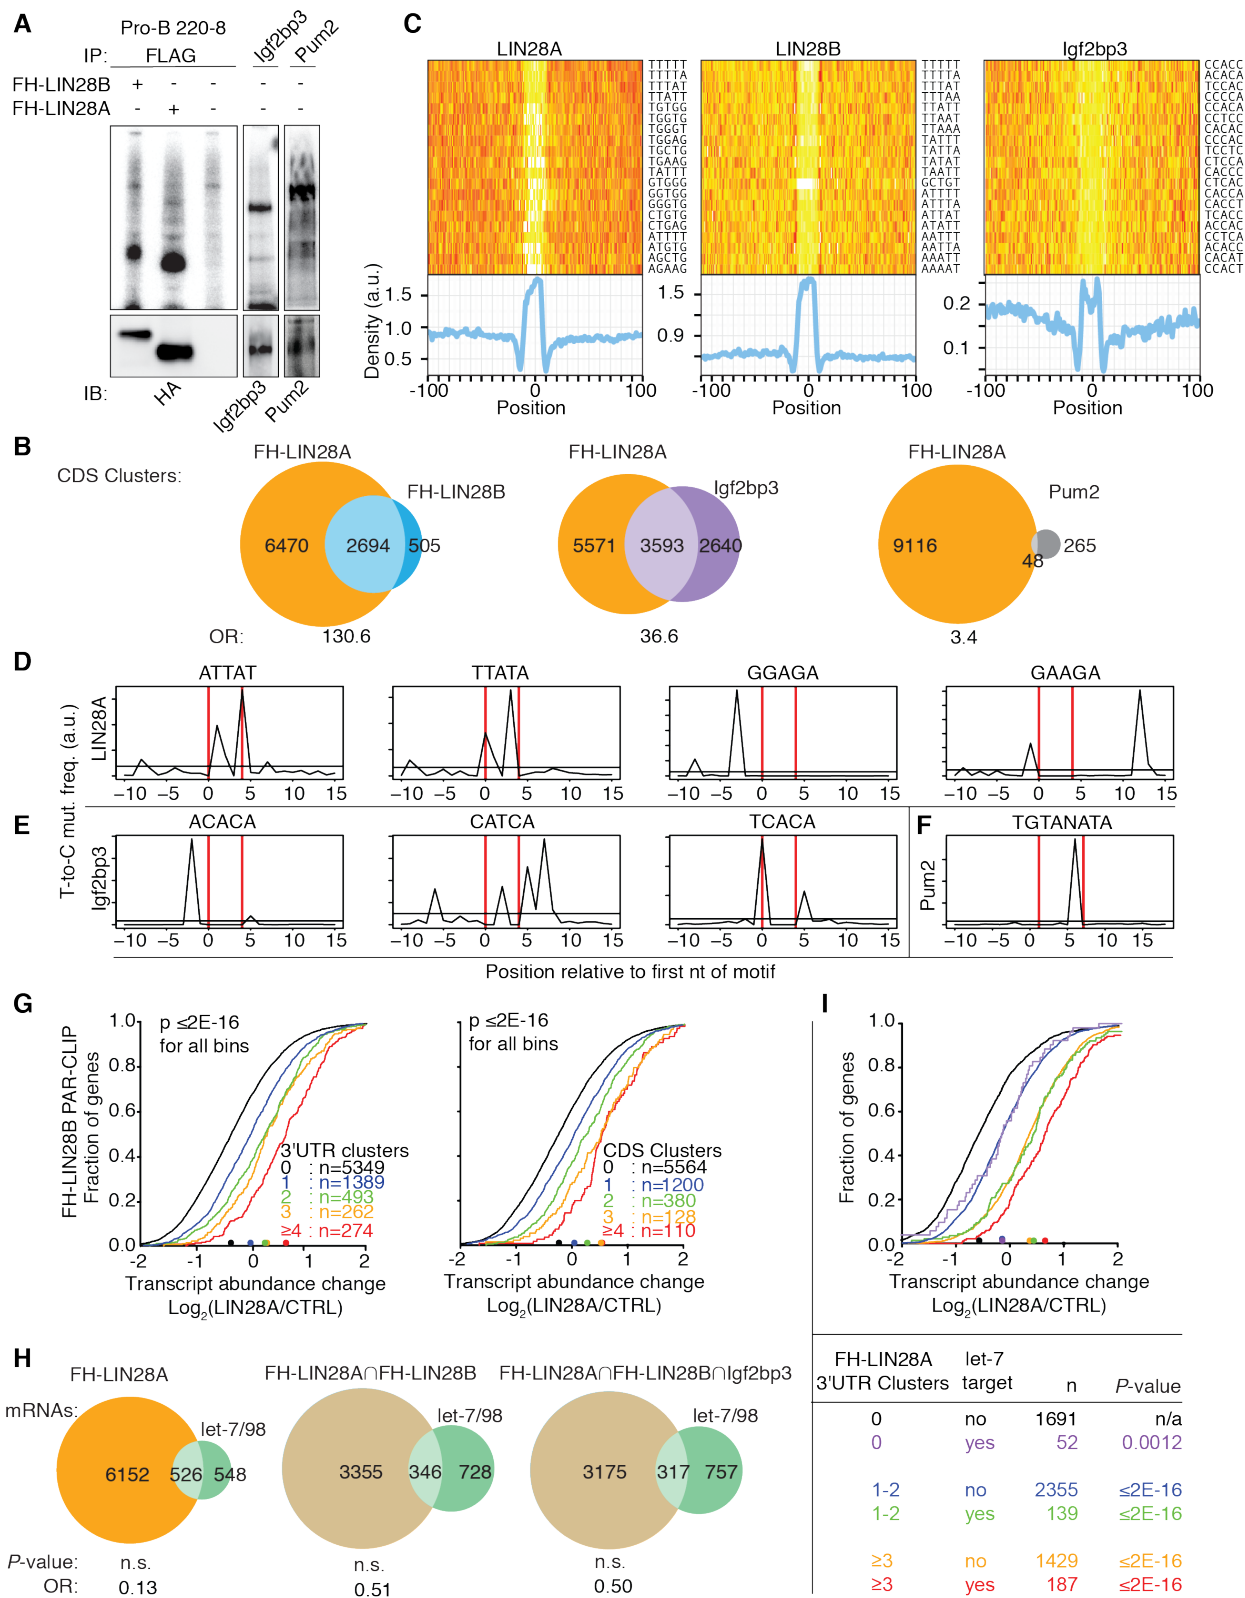

**Supplemental Figure S3.** FH-LIN28A, FH-LIN28B, Igf2bp3 and Pum2 PAR-CLIPs.

**(A)** *Top panel*, The autoradiograph shows UV-crosslinked, immunoprecipitated, and radiolabeled FH-LIN28A, FH-LIN28B, Igf2bp3, and Pum2 RNPs that were fractionated on an SDS-PAGE. *Bottom panel*, Western blots of immunoprecipitates were probed with anti-HA for FH-LIN28A or -B, anti-Igf2bp3, and anti-Pum2.

**(B)** The Venn diagrams show CDS binding sites (clusters) identified in FH-LIN28A PAR-CLIP that overlap by at least one nt with FH-LIN28B, Igf2bp3, and Pum2, respectively.

**(C)** *Top panels*, Heatmaps indicate the relative enrichment (see Methods) of the 5-mer motifs within  $\pm 100$  bp around FH-LIN28A (*left panel*), FH-LIN28B (*middle panel*), and Igf2bp3 binding sites (*right panel*). Here we compared k-mer enrichment in FH-LIN28A/B vs. Igf2bp3. *Bottom panels*, Lineplots show the relative density of occurrence of the 20 top 5-mer sequence motifs within  $\pm 100$  bp of the PAR-CLIP binding sites.

**(D)** Lineplots show the relative frequency of crosslinking induced mutations (T-to-C) mutations within  $\pm 10$  bp of the indicated motif for FH-LIN28A (*top panels*).

**(E)** Same as in **(D)**, only for the Igf2bp3 PAR-CLIP.

**(F)** Same as in **(D)**, only for the Pum2 PAR-CLIP.

**(G)** Cumulative distribution of log-transformed fold changes of mRNA expression was plotted, comparing 220-8 cells transduced with LIN28 or empty vector (CTRL). FH-LIN28B-target mRNAs are binned based on the number of PAR-CLIP binding sites in the 3'UTR (*left*) or the CDS (*right*). Significance was determined using a two-sided Kolmogorov-Smirnov (KS) test. Bin sizes are indicated.

**(H)** Venn diagrams show numbers of mRNAs co-targeted by let-7 (based on TargetScan predictions) and FH-LIN28A; or both FH-LIN28A/B; or both Igf2bp3 and FH-LIN28A/B. Not significant is denoted by n.s. The odds ratio (OR) of each overlap is indicated.

**(I)** Cumulative distribution analysis of change in mRNA expression comparing 220-8 cells transduced with LIN28A or empty vector (CTRL). FH-LIN28A-target mRNAs are binned based on the number of PAR-CLIP binding sites in the 3'UTR (either 0, 1-2 or  $\geq 3$ ) and whether they were predicted to be a let-7 target or not. Significance was determined using a two-sided Kolmogorov-Smirnov (KS) test. Bin sizes are indicated.

## Supplemental Figure S4

**A**

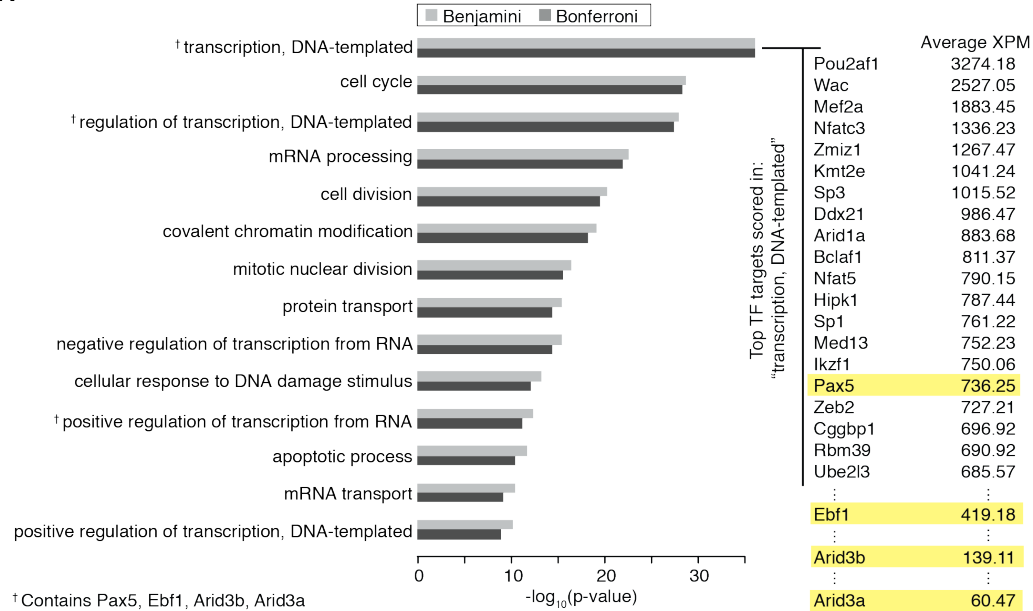

**B**

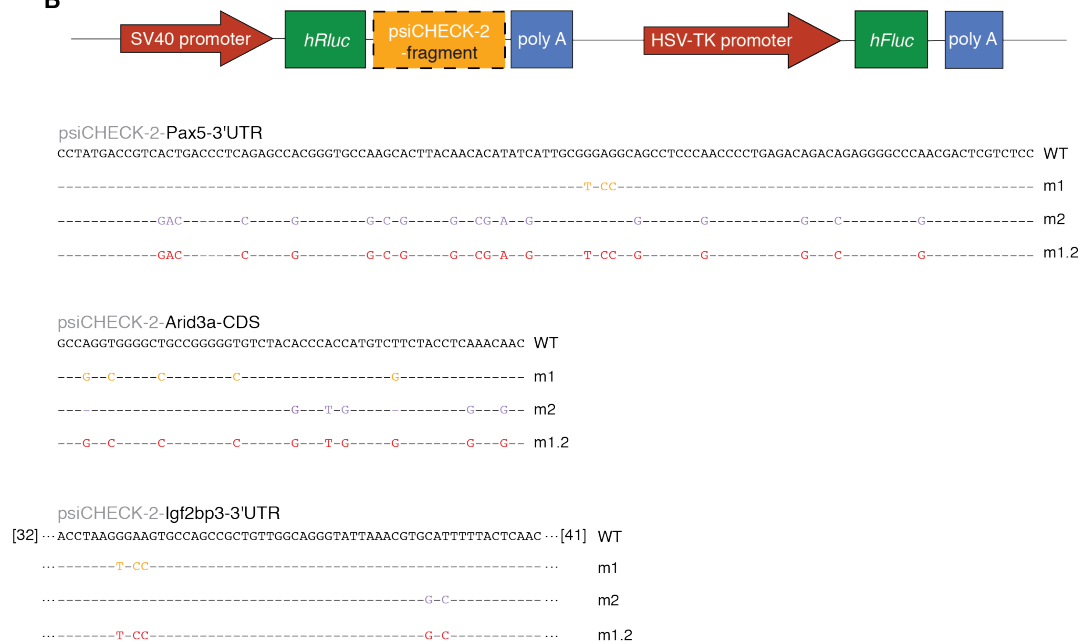

**Supplemental Figure S4.** Gene ontology analysis of shared PAR-CLIP targets and luciferase reporter constructs.

**(A)** Benjamini (light gray) and Bonferroni (dark gray) corrected *P*-values are plotted for the top enriched Biological Process GO categories, as calculated by DAVID. The top 2,500 shared targets ( $[\text{FH-LIN28A} \cup \text{FH-LIN28B}] \cap \text{Igf2bp3}$ ) based on average PAR-CLIP XPM were used as input. The top transcription factors from the category "transcription, DNA templated" are listed, ordered by average XPM (*right*).

**(B)** The schematics depict the dual luciferase reporter constructs used in the assays for Fig. 4B, 4G, and 5B. Sequence of the unmutated (WT) 117 bp fragment from 3'UTR of *Pax5*, 56 bp fragment from *Arid3a* CDS and 131 bp fragment from *Igf2bp3* 3'UTR are shown. The first set of mutations (m.1) alter the putative Lin28 ZnF RRE. The second set of mutations (m.2) alter all the potential Igf2bp3 RREs. Mutated bases are shown in orange (m.1) or purple (m.2). The third combines both sets of mutations (m1.2, red).





**Supplemental Figure S5.** Luciferase reporter constructs and results for additional shared binding sites in the *Pax5* 3'UTR

**(A)** Genome browser track of the last exon of *Pax5*, including the entire 3'UTR and other shared binding sites. The strongest shared binding site depicted in Fig. 4A is highlighted in blue, with its PAR-CLIP coverage truncated to increase visibility of other sites in the 3'UTR. Additional putative binding sites in the 3'UTR are highlighted in green.

**(B)** Luciferase reporter assays were performed for these additional fragments with or without mutations to the LIN28 motifs (m1), the Igf2bp3 motifs (m2) or both (m1.2). The results and mutations are visualized as described for Fig. 4B and Supplemental Fig. S4B.

## Supplemental Figure S6

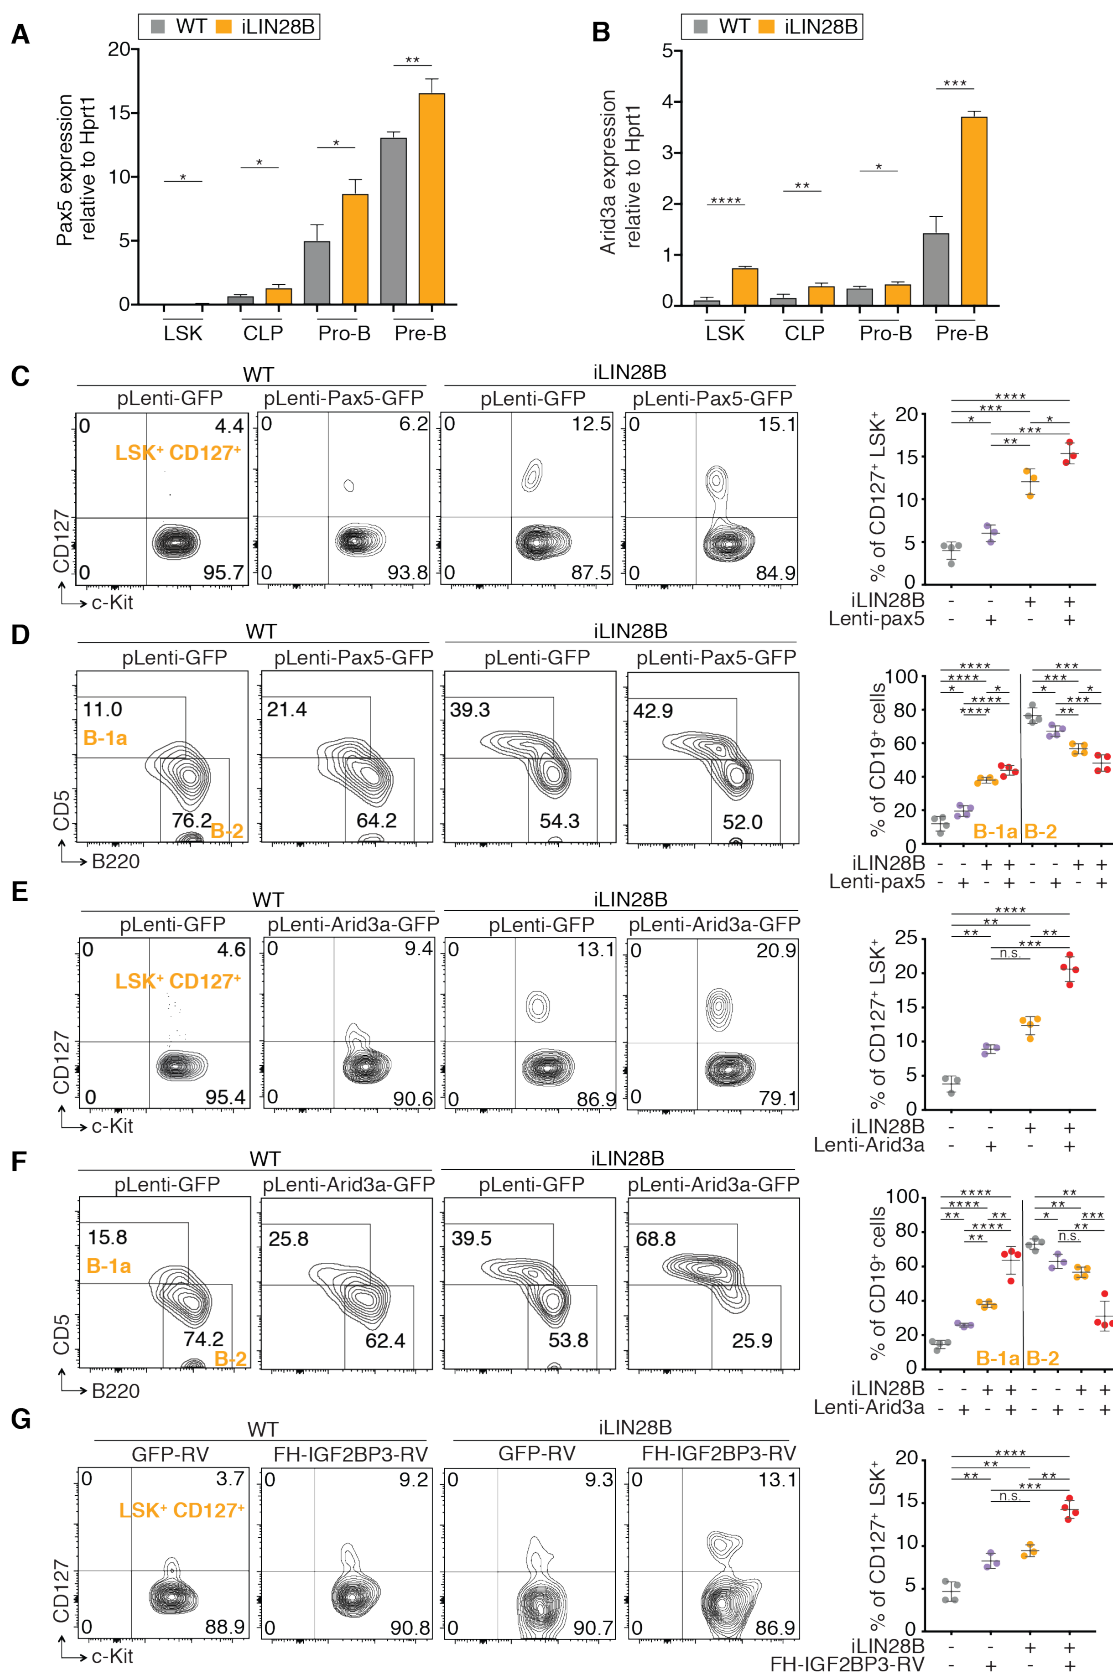

**Supplemental Figure S6.** *In vivo* validation of *Pax5*, *Arid3a* and *Igf2bp3* as shared targets of LIN28 and Igf2bp3.

**(A,B)** RT-qPCR analyses quantify *Pax5* and *Arid3a* mRNA expression normalized to *Hprt1* in LSK, CLP, pro-B and pre-B cells sorted from WT and iLIN28B mice from same litter. \*  $P \leq 0.05$ , \*\*  $P \leq 0.01$ , \*\*\*  $P \leq 0.001$ , and \*\*\*\*  $P \leq 0.0001$  represent results of two-tailed *t*-test. Error bars represent standard deviation of three biological replicates.

**(C-F)** Adult BM HSPCs from WT and iLIN28B mice were transduced with empty vector (pLenti-GFP), **(C,D)** pLenti-Pax5-GFP or **(E,F)** pLenti-Arid3a-GFP and transplanted in *Rag1*<sup>-/-</sup> recipients. **(C,E)** Representative contour plots depict flow cytometric analyses of CD127<sup>+</sup> LSK<sup>+</sup> HSPCs in BM of the indicated chimeric mice 4-6 weeks post-transplantation. *Right panels*, Percentages of LSK<sup>+</sup> CD127<sup>+</sup> cells in multiple independent BM chimeras are plotted. **(D,F)** Representative contour plots depict flow cytometric analyses of B-1a (CD19<sup>+</sup>B220<sup>lo/-</sup> CD5<sup>+</sup>) and B-2 (CD19<sup>+</sup> B220<sup>hi</sup> CD5<sup>-</sup>) cells among CD19<sup>+</sup> GFP<sup>+</sup> cells in peritoneal cavity of the indicated chimeric mice 4-6 weeks post-transplantation. *Right panels*, Percentages of B-1a and B-2 cells in multiple independent BM chimeras are plotted. \*  $P \leq 0.05$ , \*\*  $P \leq 0.01$ , \*\*\*  $P \leq 0.001$ , \*\*\*\*  $P \leq 0.0001$  represent results of two-tailed *t*-test. Error bars represent standard deviation of three to four biological replicates.

**(G)** Adult BM HSPCs from WT and iLIN28B mice were transduced with empty vector (GFP-RV) or FH-IGF2BP3-RV, and transplanted in *Rag1*<sup>-/-</sup> recipients. Representative contour plots depict flow cytometric analyses of B-1a and B-2 cells among CD19<sup>+</sup> GFP<sup>+</sup> cells in peritoneal cavity of indicated BM chimeric mice 4-6 weeks post-transplantation. *Right panel*, Percentages of B-1a and B-2 cells in multiple independent BM chimeras are plotted. \*  $P \leq 0.05$ , \*\*  $P \leq 0.01$ , \*\*\*  $P \leq 0.001$ , \*\*\*\*  $P \leq 0.0001$  represent results of two-tailed *t*-test. Error bars represent standard deviation of three to four biological replicates.

## Supplementary Tables and Legends

**Supplemental Table 1.** Summary statistics for single-cell RNA-seq of CLPs

| Sample name  | Starting cell # | Detected cell # | Post-filter cell # | Total reads | Reads in cells | Mean reads per cell | Median genes per cell | Total genes detected | Median UMI counts per cell | Sequencing saturation |
|--------------|-----------------|-----------------|--------------------|-------------|----------------|---------------------|-----------------------|----------------------|----------------------------|-----------------------|
| WT BM        | 4000            | 1087            | 858                | 37,393,092  | 91.8%          | 34400               | 2086                  | 14129                | 5356                       | 65.9%                 |
| WT BM +Dox   | 4000            | 1653            | 1083               | 36,526,664  | 92.0%          | 22097               | 1871                  | 14464                | 4500                       | 60.5%                 |
| iLIN28B +Dox | 4000            | 1638            | 1238               | 40,948,667  | 93.3%          | 24999               | 1930                  | 14155                | 4800                       | 61.3%                 |
| FL           | 4000            | 1127            | 653                | 35,125,028  | 86.3%          | 31166               | 1668                  | 14158                | 3962                       | 67.9%                 |

**Supplemental Table 2.** Summary statistics for low-input RNA-seq of LSKs and CLPs

| Sample name | Total reads | Uniquely mapped reads | Uniquely mapped reads % | Multi-mapped | Unmapped too short | Unmapped other | Total mapped | Total unmapped |
|-------------|-------------|-----------------------|-------------------------|--------------|--------------------|----------------|--------------|----------------|
| BM_LSK      | 18,870,288  | 11,786,522            | 62.5%                   | 832,343      | 32.4%              | 0.24%          | 12,618,865   | 7,916,109      |
| BM_CLP      | 26,824,642  | 16,120,702            | 60.1%                   | 1,124,129    | 35.2%              | 0.11%          | 17,244,831   | 11,828,069     |
| FL_LSK      | 19,912,754  | 12,498,331            | 62.8%                   | 913,033      | 32.2%              | 0.13%          | 13,411,364   | 8,327,456      |
| FL_CLP      | 19,806,013  | 12,865,772            | 65.0%                   | 964,631      | 29.8%              | 0.09%          | 13,830,403   | 7,904,872      |

**Supplemental Table 3.** Proteins interacting with FH-LIN28A in 220-8 pro-B cells determined by affinity purification and mass spectrometry.

| Protein name                                                    | NCBI link                 | Mass (kDa) | Spectrum counts (no RNase) | Spectrum counts (+RNase) | %Sequence coverage |
|-----------------------------------------------------------------|---------------------------|------------|----------------------------|--------------------------|--------------------|
| Protein lin-28 homolog A                                        | <a href="#">81914711</a>  | 22.7       | 414                        | 398                      | 73%                |
| Polyadenylate-binding protein 1                                 | <a href="#">341941223</a> | 70.6       | 185                        | 66                       | 61%                |
| Insulin-like growth factor 2 mRNA-binding protein 3             | <a href="#">81916748</a>  | 63.5       | 69                         | 12                       | 53%                |
| Polypyrimidine tract-binding protein-associated-splicing factor | <a href="#">68566057</a>  | 75.4       | 76                         | 1                        | 29%                |
| Fragile X mental retardation syndrome-related protein 1         | <a href="#">25090336</a>  | 76.2       | 60                         | 1                        | 48%                |
| Lupus La protein homolog                                        | <a href="#">417240</a>    | 47.7       | 264                        | 0                        | 62%                |
| Ras GTPase-activating protein-binding protein 1                 | <a href="#">14916571</a>  | 51.8       | 86                         | 0                        | 50%                |
| A-kinase anchor protein 9                                       | <a href="#">300681022</a> | 435.9      | 82                         | 0                        | 22%                |
| Putative helicase MOV-10                                        | <a href="#">50403726</a>  | 113.5      | 75                         | 0                        | 45%                |
| 60 kDa SS-A/Ro ribonucleoprotein                                | <a href="#">12643534</a>  | 60.1       | 71                         | 0                        | 44%                |
| Ataxin-2-like protein                                           | <a href="#">52000711</a>  | 110.6      | 65                         | 0                        | 32%                |
| Non-POU domain-containing octamer-binding protein               | <a href="#">67460966</a>  | 54.5       | 56                         | 0                        | 48%                |
| Nuclear fragile X mental retardation-interacting protein 2      | <a href="#">81862045</a>  | 75.6       | 53                         | 0                        | 35%                |

**Supplemental Table 4.** Summary statistics for PAR-CLIP in 220-8 pro-B cells

| PAR-CLIP    | Total reads | Uniquely aligned | %Uniquely aligned | 3'UTR clusters | CDS clusters | Transcripts targeted |
|-------------|-------------|------------------|-------------------|----------------|--------------|----------------------|
| FH-LIN28A_1 | 34,027,694  | 8,167,808        | 25.3%             | 25640          | 19360        | 9294                 |
| FH-LIN28A_2 | 58,260,755  | 14,068,227       | 24.2%             | 33397          | 25406        | 10167                |
| FH-LIN28A_3 | 50,535,146  | 11,354,555       | 22.5%             | 25923          | 19153        | 9542                 |
| FH-LIN28A_4 | 42,963,267  | 1,758,861        | 4.2%              | 9338           | 4734         | 5664                 |
| FH-LIN28B_1 | 61,660,584  | 1,874,937        | 3.1%              | 4996           | 3805         | 4580                 |
| FH-LIN28B_2 | 84,198,466  | 4,020,255        | 4.8%              | 15799          | 9198         | 7887                 |
| FH-LIN28B_3 | 53,483,484  | 3,369,146        | 6.4%              | 7470           | 4114         | 5296                 |
| FH-LIN28B_4 | 47,212,819  | 3,852,105        | 8.3%              | 8630           | 4461         | 5825                 |
| Igf2bp3_1   | 27,543,980  | 6,632,891        | 24.2%             | 21287          | 14844        | 8457                 |
| Igf2bp3_2   | 46,551,091  | 6,231,498        | 13.4%             | 22093          | 13185        | 8376                 |
| Igf2bp3_3   | 20,594,088  | 1,446,708        | 7.1%              | 8058           | 5401         | 5201                 |
| Igf2bp3_4   | 124,649,193 | 13,319,556       | 10.9%             | 14030          | 7251         | 6219                 |
| Pum2        | 19,220,265  | 1,483,886        | 7.8%              | 6685           | 568          | 3691                 |

**Supplemental Table 5.** The coordinates, number of sequence reads, and number of crosslinked sequence reads for binding sites of FH-LIN28A, FH-LIN28B, Igf2bp3, and Pum2 are shown. Data for each RBP are found in separate sheets. FH-LIN28A, FH-LIN28B, and Igf2bp3 binding sites reported that were found in at least three out of four biological replicates. (please see Excel file online)

**Supplemental Table 6.** Z-scores of 5-mers highlighted in Fig. 3E grouped according to the same colors.

|       | 5-mer  | LIN28 | Igf2bp3 | Pum2  |
|-------|--------|-------|---------|-------|
|       | GGAGA  | 3.70  | 0.82    | 0.59  |
|       | GAAGA  | 4.09  | 0.70    | 0.09  |
|       | AGAGA  | 2.96  | 0.82    | 0.36  |
|       | AAAAA  | 2.97  | 0.21    | 2.66  |
|       | UUUUU  | 4.67  | 0.78    | 1.95  |
|       | AGAAG  | 4.37  | 0.90    | 0.07  |
|       | UGGAG  | 3.84  | 0.95    | 1.57  |
|       | GAGAA  | 3.26  | 0.87    | 0.33  |
|       | AUUUU  | 4.70  | 0.84    | 0.45  |
|       | UGGAA  | 3.23  | 1.32    | 0.62  |
|       | UUUCC  | 2.87  | 1.16    | 1.29  |
|       | UCAUC  | 0.95  | 2.84    | -0.33 |
|       | CACAG  | 0.92  | 3.31    | 0.71  |
|       | CACAC  | 0.37  | 3.49    | 1.27  |
|       | UCACA  | 0.49  | 3.91    | 0.12  |
|       | CAUCA  | 1.46  | 4.39    | -0.06 |
|       | CUUCA  | 2.52  | 3.80    | 0.31  |
|       | CAGCC  | 1.51  | 3.62    | 0.58  |
|       | CAGCA  | 0.96  | 3.65    | 0.76  |
|       | CUCUG  | 1.43  | 2.87    | 1.08  |
|       | CCACA  | 1.27  | 2.71    | 0.53  |
|       | ACACA  | 0.31  | 3.92    | 1.82  |
|       | CCAUC  | 0.76  | 2.91    | -0.01 |
|       | CACCA  | 0.78  | 3.63    | 0.77  |
|       | CAUCU  | 1.54  | 3.43    | 0.20  |
| CUCCA | 2.39   | 2.87  | 0.38    |       |
|       | UCUUC  | 3.59  | 3.34    | 0.31  |
|       | CUUCU  | 2.35  | 2.08    | 0.48  |
|       | CUUCC  | 3.11  | 2.53    | 1.00  |
|       | CAUUU  | 2.56  | 2.65    | 0.96  |
|       | UUCCA  | 2.82  | 2.77    | 0.47  |
|       | UGCUG  | 2.84  | 1.71    | 0.71  |
|       | UCUCU  | 2.48  | 2.27    | 0.78  |
|       | UUUCU  | 3.84  | 2.13    | 1.3   |
|       | CUCCU  | 2.29  | 2.28    | 0.58  |
|       | UAUUAU | -1.64 | -1.47   | 4.26  |
|       | GUAAA  | -2.03 | -0.52   | 3.62  |
|       | AUGUA  | -2.16 | -0.64   | 4.24  |
|       | UGUAC  | -1.19 | -0.71   | 3.47  |
|       | UGUAA  | -1.84 | -0.71   | 5.01  |
|       | UGUAU  | -1.67 | -0.33   | 4.94  |
|       | UUGUA  | -1.79 | -0.39   | 4.80  |
|       | AUAUA  | -2.86 | -1.53   | 3.31  |
|       | UUUGU  | 0.13  | 0.11    | 3.36  |
|       | CUGUA  | -0.76 | -0.18   | 3.38  |



**Supplemental Table 7.** The table summarizes the PAR-CLIP results across the transcriptome. The number of binding sites and crosslinked reads for different annotation categories (5'UTR, 3'UTR, CDS, and intron) are shown. The gene expression levels in WT 220-8 and LIN28A-220-8 are also shown. Predicted let-7 target genes are indicated. (please see Excel file online)

**Supplemental Table 8.** The table summarizes data for luciferase reporter assays presented in Fig. 4B (Pax5), 4G (Arid3a), 5B (Igf2bp3), and Supplemental Fig. S5B (Pax5, additional sites). The schematics of reporter constructs are described in Supplemental Fig. S4B. Raw data are available upon request.

**Supplemental Table 9.** List of antibodies and staining reagents used in this study

| Antigen/description                                | Antibody (clone)             | Conjugate | Applications and dilutions                                        | Source                      |
|----------------------------------------------------|------------------------------|-----------|-------------------------------------------------------------------|-----------------------------|
| mouse/human $\beta$ -actin                         | mouse (AC-15)                | HRP       | WB (1:25,000)                                                     | Sigma #A3854                |
| mouse/human $\alpha$ -tubulin                      | B-5-1-2                      |           | WB (1:2000)                                                       | Sigma #T5168                |
| FLAG <sup>®</sup> epitope                          | mouse (M2)                   |           | IF (1:100), WB (1:2000)                                           | Sigma #F1804                |
| FLAG <sup>®</sup> epitope                          | mouse (M2)                   | Cy3       | IF (1:100)                                                        | Sigma #A9594                |
| Anti-FLAG Magnetic Beads                           | mouse (M2)                   |           | PAR-CLIP, IP                                                      | Sigma #M8823                |
| mouse/human PUM2                                   | rabbit                       |           | IF (1:200)                                                        | Sigma #HPA030316            |
| mouse/human PUM2                                   | rabbit                       |           | PAR-CLIP (1:120), WB (1:10000)                                    | Bethyl #A300-202A           |
| HA epitope                                         | rabbit (C29F4)               |           | WB (1:1000)                                                       | CST #3724                   |
| mouse/human Igf2bp3                                | rabbit                       |           | PAR-CLIP (1:50), IF (1:800), IP (1:50), WB (1:1000), FACS (1:100) | Millipore #03-198           |
| mouse/human LIN28A                                 | rabbit                       |           | WB (1:1000)                                                       | Millipore #03-105           |
| mouse LIN28B                                       | rabbit                       |           | WB (1:1000), FACS (1:100)                                         | CST #5422                   |
| human LIN28B                                       | rabbit                       |           | WB (1:1000)                                                       | CST #4196                   |
| Alexa Fluor <sup>™</sup> 647 Antibody Labeling Kit | n/a                          | Alexa647  | FACS (primary antibody labeling)                                  | Thermo Fisher #A20186       |
| Alexa Fluor <sup>™</sup> 555 Antibody Labeling Kit | n/a                          | Alexa555  | FACS (primary antibody labeling)                                  | Thermo Fisher #A20187       |
| DYKDDDDK (aka FLAG epitope)                        | rabbit                       | Alexa647  | FACS (1:50)                                                       | CST #3196                   |
| mouse/human TNRC6A (GW182)                         | rabbit                       |           | IF (1:200)                                                        | Abcam #ab156173             |
| mouse IgG (H+L chains)                             | goat (highly cross-adsorbed) | Alexa555  | IF (1:500)                                                        | Life Tech #A-21422          |
| mouse IgG (H+L chains)                             | goat (highly cross-adsorbed) | Alexa488  | IF (1:500)                                                        | Life Tech #A-11029          |
| rabbit IgG (H+L chains)                            | goat (highly cross-adsorbed) | Alexa555  | IF (1:500)                                                        | Life Tech #A-21428          |
| rabbit IgG (H+L chains)                            | goat (highly cross-adsorbed) | Alexa488  | IF (1:1000)                                                       | Life Tech #A-11008          |
| rabbit IgG (H+L chains)                            | goat (highly cross-adsorbed) | Alexa647  | FACS (1:1000)                                                     | Thermo Fisher #A-21242      |
| mouse IgG (L chain)                                | goat (highly cross-adsorbed) | HRP       | WB (1:3000)                                                       | Jackson Immuno #115-035-174 |

|                                            |                                                  |                |              |                         |
|--------------------------------------------|--------------------------------------------------|----------------|--------------|-------------------------|
| rabbit IgG (H+L chains)                    | goat (affinity purified)                         | HRP            | WB (1:3000)  | CST #7074               |
| mouse Ebf1                                 | mouse (T26-818)                                  | PE             | FACS (1:100) | BD #T26-818             |
| human/mouse/rat Hmga2                      | rabbit                                           |                | FACS (1:100) | CST #5269               |
| mouse/human TdT                            | mouse (19-3)                                     | APC            | FACS (1:100) | Miltenyi 130-100-749    |
| mouse/human Pax5                           | rat (1H9)                                        | APC            | FACS (1:100) | eBioscience #17-9918-80 |
| mouse/human Arid3a                         | rabbit                                           |                | FACS (1:100) | Sigma #AV32869          |
| rabbit IgG isotype CTRL                    | rabbit (PP64)                                    |                | FACS (1:100) | Millipore #637709       |
| IgG isotype CTRL                           | rat (eBR2a)                                      | PE             | FACS (1:100) | eBioscience #12-4321-80 |
| IgG isotype CTRL                           | rat (RTK4530)                                    | APC            | FACS (1:100) | BioLegend #400611       |
| IgG isotype CTRL                           | mouse (MOPC-21)                                  | PE             | FACS (1:100) | BD #554680              |
| mouse Sca-1 (Ly-6A/E)                      | rat (D7)                                         | PerCP-Cy5.5    | FACS (1:100) | eBioscience #45-5981-82 |
| mouse CD117 (c-Kit)                        | rat (2B8)                                        | APC            | FACS (1:100) | BioLegend #105812       |
| mouse CD117 (c-Kit)                        | rat (ACK2)                                       | APC-eFluor 780 | FACS (1:100) | eBioscience #47-1171-82 |
| mouse CD117 (c-Kit)                        | rat (2B8)                                        | eFluor 450     | FACS (1:100) | eBioscience #48-1171-82 |
| mouse CD127 (IL7R $\alpha$ )               | rat (A7R34)                                      | PE             | FACS (1:100) | BioLegend #135010       |
| mouse/human CD45R (B220)                   | rat (RA3-6B2)                                    | eFluor 450     | FACS (1:100) | eBioscience #48-0452-82 |
| mouse/human CD45R (B220)                   | rat (RA3-6B2)                                    | PerCP-Cy5.5    | FACS (1:100) | BioLegend #103236       |
| mouse IgM                                  | rat (RMM-1)                                      | FITC           | FACS (1:100) | BioLegend #406505       |
| mouse IgM                                  | rat (RMM-1)                                      | PerCP-Cy5.5    | FACS (1:100) | BioLegend #406512       |
| mouse CD25 (IL2R $\alpha$ )                | rat (3C7)                                        | PE             | FACS (1:100) | BioLegend #101904       |
| mouse CD5                                  | rat (53-7.3)                                     | eFluor 450     | FACS (1:100) | eBioscience #48-0051-82 |
| mouse CD19                                 | rat (eBio1D3)                                    | PE             | FACS (1:100) | eBioscience #12-0193-82 |
| mouse CD23                                 | rat (B3B4)                                       | PE             | FACS (1:100) | BioLegend #101608       |
| mouse CD1d                                 | rat (1B1)                                        | APC            | FACS (1:100) | BioLegend #123522       |
| mouse hematopoietic Lineage (Lin) cocktail | rat (145-2C11, RB6-8C5, M1/70, RA3-6B2, Ter-119) | FITC           | FACS (1:100) | BioLegend #133302       |
| 100nm, DOPC/CHOL Liposomes                 | n/a                                              | PE             | FACS (1:100) | FormuMax #F60103F-NBD   |

**Supplemental Table 10.** List of oligonucleotides used in plasmid construction

| Name of construct             | Forward Oligo (5'→3')                                                                                                                     | Reverse Oligo (5'→3')                                                                                                                   |
|-------------------------------|-------------------------------------------------------------------------------------------------------------------------------------------|-----------------------------------------------------------------------------------------------------------------------------------------|
| pMSCVpuro-FH-LIN28A           | GGAGATCTACCATGGACTACAAGGACG ACGATG                                                                                                        | GGCTCGAGTCAATTCTGTGCCTCCGGGAG                                                                                                           |
| pMSCVpuro-FH-LIN28B           | GCCGGAATTAGATCTCACCATGGACTAC AAGGAC                                                                                                       | TCCCCTACCCGGTAGTTATGTCTTTTTCTTT TTTGAAC                                                                                                 |
| pGFP-RV-LIN28A                | CTAGGCGCCGGAATTAACCATGGGCTCC GTGTCC                                                                                                       | TCGATACCGTCGACCTAATTCTGTGCCTCCG GG                                                                                                      |
| pGFP-RV-LIN28B                | CTAGGCGCCGGAATTAACCATGGCCGA AAGCGGG                                                                                                       | TCGATACCGTCGACCTTATGTCTTTTTCTTT TTTGAACTGAAGGCC                                                                                         |
| pMSCVneo-FH-IGF2BP3           | GGGAATTCACCATGGACTACAAGGACG ACGATG                                                                                                        | GGCTCGAGTTACTTCCGTCTTGACTGAGG                                                                                                           |
| pGFP-RV-FH-IGF2BP3            | CTAGGCGCCGGAATTAATGGACTACAA GGACGAC                                                                                                       | TCGATACCGTCGACCTTACTTCCGTCTTGAC TG                                                                                                      |
| psiCHECK-2-Igf2bp3-3'UTR WT   | TGTCTCCTGTTTCTCTAACACTAACATGG ATAACCTAAGGGAAGTGCCAGCCGCTGT TGGCAGGGTATTAACCGTGCATTTTTAC TCAACTACCTCAGGTATTCAGTAATACA GTTAAAAGCAAAAATTATT  | AATAATTTTGCTTTTAACTGTATTACTGAAT ACCTGAGGTAGTTGAGTAAAAATGCACGTT TAATACCCTGCCAACAGCGGCTGGCACTTC CCTTAGGTTATCCATGTTAGTGTAGAGAA ACAGGAGACA  |
| psiCHECK-2-Igf2bp3-3'UTR m1   | TGTCTCCTGTTTCTCTAACACTAACATGG ATAACCTAAGTGCCGTGCCAGCCGCTGT TGGCAGGGTATTAACCGTGCATTTTTAC TCAACTACCTCAGGTATTCAGTAATACA GTTAAAAGCAAAAATTATT  | AATAATTTTGCTTTTAACTGTATTACTGAAT ACCTGAGGTAGTTGAGTAAAAATGCACGTT TAATACCCTGCCAACAGCGGCTGGCACGGC ACTTAGGTTATCCATGTTAGTGTAGAGAA ACAGGAGACA  |
| psiCHECK-2-Igf2bp3-3'UTR m2   | TGTCTCCTGTTTCTCTAACACTAACATGG ATAACCTAAGGGAAGTGCCAGCCGCTGT TGGCAGGGTATTAACCGTGGACTTTTTAC TCAACTACCTCAGGTATTCAGTAATACA GTTAAAAGCAAAAATTATT | AATAATTTTGCTTTTAACTGTATTACTGAAT ACCTGAGGTAGTTGAGTAAAAAGTCCACGTT TAATACCCTGCCAACAGCGGCTGGCACTTC CCTTAGGTTATCCATGTTAGTGTAGAGAA ACAGGAGACA |
| psiCHECK-2-Igf2bp3-3'UTR m1.2 | TGTCTCCTGTTTCTCTAACACTAACATGG ATAACCTAAGTGCCGTGCCAGCCGCTGT TGGCAGGGTATTAACCGTGGACTTTTTAC TCAACTACCTCAGGTATTCAGTAATACA GTTAAAAGCAAAAATTATT | AATAATTTTGCTTTTAACTGTATTACTGAAT ACCTGAGGTAGTTGAGTAAAAAGTCCACGTT TAATACCCTGCCAACAGCGGCTGGCACGGC ACTTAGGTTATCCATGTTAGTGTAGAGAA ACAGGAGACA |
| psiCHECK-2-Pax5-3'UTR WT      | CCTATGACCGTCACTGACCCTCAGAGCC ACGGGTGCCAAGCACTTACAACACATAT CATTGCGGGAGGCAGCCTCCCAACCCCT GAGACAGACAGAGGGGCCCAACGACTC GTCTCC                 | GGAGACGAGTCGTTGGGCCCTCTGTCTGT CTCAGGGGTTGGGAGGCTGCCTCCCGCAAT GATATGTGTTGTAAGTGCTTGGCACCCGTG GCTCTGAGGGTCAGTGACGGTCATAGG                 |
| psiCHECK-2-Pax5-3'UTR m1      | CCTATGACCGTCACTGACCCTCAGAGCC ACGGGTGCCAAGCACTTACAACACATAT CATTGCGTGCCGAGCCTCCCAACCCCT GAGACAGACAGAGGGGCCCAACGACTC GTCTCC                  | GGAGACGAGTCGTTGGGCCCTCTGTCTGT CTCAGGGGTTGGGAGGCTGCGGCACGCAAT GATATGTGTTGTAAGTGCTTGGCACCCGTG GCTCTGAGGGTCAGTGACGGTCATAGG                 |
| psiCHECK-2-Pax5-3'UTR m2      | CCTATGACCGTCGACGACCCTCCGAGCC GCGGGTGCCGACCGCTTACGACCAGAAAT GATTGCGGGAGGCGGCCTCCCGACCCCT GAGACGGACCGAGGGGCCCGACGACTC GTCTCC                | GGAGACGAGTCGTCGGGCCCTCGGTCCGT CTCAGGGGTCGGGAGGCCCGCTCCCGCAAT CATTTCGGTCGTAAGCGGTGCGGCACCCGCG GCTCGGAGGGTCGTCGACGGTCATAGG                |
| psiCHECK-2-Pax5-3'UTR m1.2    | CCTATGACCGTCGACGACCCTCCGAGCC GCGGGTGCCGACCGCTTACGACCAGAAAT GATTGCGTGCCGCGGCCTCCCGACCCCT GAGACGGACCGAGGGGCCCGACGACTC GTCTCC                | GGAGACGAGTCGTCGGGCCCTCGGTCCGT CTCAGGGGTCGGGAGGCCCGCGGCACGCAAT CATTTCGGTCGTAAGCGGTGCGGCACCCGCG GCTCGGAGGGTCGTCGACGGTCATAGG               |

|                                                       |                                                                                                                 |                                                                                                                  |
|-------------------------------------------------------|-----------------------------------------------------------------------------------------------------------------|------------------------------------------------------------------------------------------------------------------|
| psiCHECK-2-Arid3a-CDS WT                              | GCCAGGTGGGGCTGCCGGGGGTGTCTAC<br>ACCCACCATGTCTTCTACCTCAAACAAC                                                    | GTTGTTTGAGGTAGAAGACATGGTGGGTG<br>TAGACACCCCCGGCAGCCCCACCTGGC                                                     |
| psiCHECK-2-Arid3a-CDS m1                              | GCCGGGCGGGGCCCGGGGGCGTCT<br>ACACCCACCATGTCTGTCTACCTCAAAC<br>AAC                                                 | GTTGTTTGAGGTAGACGACATGGTGGGTG<br>TAGACGCCCCGGCGGCCCG CCCGGC                                                      |
| psiCHECK-2-Arid3a-CDS m2                              | GCCAGGTGGGGCTGCCGGGGGTGTCT<br>ACGCCCTCGATGTCTTCTACCTCGAAC<br>GAC                                                | GTCGTTGAGGTAGAAGACATCGAGG GCG<br>TAGACACCCCCGGCAGCCCCACCTGGC                                                     |
| psiCHECK-2-Arid3a-CDS m1.2                            | GCCGGGCGGGGCCCGGGGGCGTCT<br>ACGCCCTCGATGTCTGTCTACCTCGAAC<br>GAC                                                 | GTCGTTGAGGTAGACGACATCGAGGGCG<br>TAGACGCCCCGGCGGCCCGCCCCGGC                                                       |
| psiCHECK-2-Pax5 additional shared binding site 1 WT   | CCAGAACCAGACCGGGAGACCAAACAG<br>ACCTCCTTCCCACGTATTCTGTGCCTCCA<br>TACCCCAATTACGTCTCTGAATAGTGA<br>AGGCTCTGAGCAGTG  | CACTGCTCAGAGCCTTCACTATTCAGAGAC<br>GTAATTGGGGGTATGGAGGCACAGAATACG<br>TGGGAAGGAGGTCTGTTTGGTCTCCCGGTC<br>TGGTCTGG   |
| psiCHECK-2-Pax5 additional shared binding site 1 m1   | CTAGAACCCGACCGGGCGACCTAACAG<br>ACCTCCGTCCCACGTATTCTGTGCCTCC<br>ATACCCCTAATTACGTCTCTGAATAGTG<br>ACGGCTCTGCGCAGCG | CGCTGCGCAGAGCCGTCCTACTATTCAGAGAC<br>GTAATTAGGGGTATGGAGGCACAGAATACG<br>TGGGACGGAGGTCTGTTAGGTCGCCCCGTC<br>GGTCTAG  |
| psiCHECK-2-Pax5 additional shared binding site 1 m2   | CCCGAACCAGACCGGGAGACCAAACCG<br>ACCTCCGTCCCACGTATTCTGCGCCTCT<br>ATACCCCAATTACGTCTCCGAATAGTG<br>AACGATCTGAGCAGCG  | CGCTGCTCAGATCGTTCCTACTATTCGAGAC<br>GTAATTGGGGGTATAGAGGCGCAGAATACG<br>TGGGACGGAGGTGCGTTTGGTCTCCCGGTC<br>TGGTCTGGG |
| psiCHECK-2-Pax5 additional shared binding site 1 m1.2 | CTCGAACCCGACCGGGCGACCTAACCG<br>ACCTCCGTCCCACGTATTCTGCGCCTCT<br>ATACCCCTAATTACGTCTCCGAATAGTG<br>ACCGATCTGCGCAGCG | CGCTGCGCAGATCGGTCCTACTATTCGAGAC<br>GTAATTAGGGGTATAGAGGCGCAGAATACG<br>TGGGACGGAGGTGCGTTAGGTCGCCCCGTC<br>GGTCTAG   |
| psiCHECK-2-Pax5 additional shared binding site 2 WT   | CTAGAATTTAACTCCACGCCATGGGGAG<br>CAAATCTTAAAAACAAACCAAGCACTTC<br>CAAACAAATACTAGGAGCAAGTGACGT<br>CTGACACACAGTCTCT | AGAGACTGTGTGTCAGACGTCCTTGCTCC<br>TAGTATTTGTTTGAAGTGCTTGGTTTGT<br>TTAAGATTTGCTCCCATGGCGTGGAGTTA<br>AATTCTAG       |
| psiCHECK-2-Pax5 additional shared binding site 2 m1   | CTAGAATTTAACTCCACGCCATGGCGAG<br>ATAATCTTAATAACAAACCTAGCACTTG<br>TAAACAAATACTAGGCGCAAGCGACGT<br>CTGACACACAGTCTCG | CGAGACTGTGTGTCAGACGTCGCTTGCGCC<br>TAGTATTTGTTTACAAGTGCTAGGTTGTTA<br>TTAAGATTATCTCGCCATGGCGTGGAGTTA<br>AATTCTAG   |
| psiCHECK-2-Pax5 additional shared binding site 2 m2   | CTAGAATTTAACTACACGCCATGGGGCG<br>CAAATCTTAAAAACTAACACGCATATC<br>CAAACAAATACTAGGCGCAAGTGACGTC<br>TGATATATAGTCTCG  | CGAGACTATATATCAGACGTCCTTGCGCC<br>TAGTATTAGTTTGGATATGCGTGGTTAGTTT<br>TTAAGATTTGCGCCCCATGGCGTGTAGTTA<br>AATTCTAG   |
| psiCHECK-2-Pax5 additional shared binding site 2 m1.2 | CTAGAATTTAACTACACGCCATGGCGCG<br>ATAATCTTAATAACTAACCTCGCATATG<br>TAAACAAATACTAGGCGCAAGCGACGTC<br>TGATATATAGTCTCG | CGAGACTATATATCAGACGTCGCTTGCGCC<br>TAGTATTAGTTTACATATGCGAGGTTAGTTA<br>TTAAGATTATCGCGCCATGGCGTGTAGTTA<br>AATTCTAG  |

|                                                       |                                                                                                                 |                                                                                                                |
|-------------------------------------------------------|-----------------------------------------------------------------------------------------------------------------|----------------------------------------------------------------------------------------------------------------|
| psiCHECK-2-Pax5 additional shared binding site 3 WT   | ATGAAACTGTTTTATTGTATTTGAGGAA<br>ATGGAGAGTTGAACATTCCAACCAATCA<br>ATAGCCAAAAAATGCTATAAACATAAA<br>AAGAAAAATAATCCCA | TGGGATTTATTTCTTTTTATGTTTATAGCAT<br>TTTTTGGCTATTGATTGGTTGGAATGTTCAA<br>CTCTCCATTTCTCAAATACAATAAAACAGT<br>TTCAT  |
| psiCHECK-2-Pax5 additional shared binding site 3 m1   | ATGAAACTGTTGTATTGTATTTGACGAA<br>ATGTAGAGTTGAACATTCTAACCAATCA<br>ATAGCCAATAAATGCTATAAACATAAAT<br>AGATAATAAATCCTA | TAGGATTTATTATCTATTTATGTTTATAGCA<br>TTTATTGGCTATTGATTGGTTAGAATGTTCA<br>ACTCTACATTTCTCAAATACAATACAACA<br>GTTTCAT |
| psiCHECK-2-Pax5 additional shared binding site 3 m2   | ACGAAACCGTTTTATTGTATTTGAGGAA<br>ATGGCGCGTTGAACCGTCCAACCAATCA<br>ATAGCTAAAAAATGCTATAAATATAAA<br>AAGATAATAAATCCCA | TGGGATTTATTATCTTTTTATATTTATAGCA<br>TTTTTTAGCTATTGATTGGTTGGACGGTTCA<br>ACGCGCCATTTCTCAAATACAATAAAACG<br>GTTTCGT |
| psiCHECK-2-Pax5 additional shared binding site 3 m1.2 | ACGAAACCGTTGTATTGTATTTGACGAA<br>ATGTCGCGTTGAACCGTCTAACCAATCA<br>ATAGCTAATAAATGCTATAAATATAAAT<br>AGATAATAAATCCTA | TAGGATTTATTATCTATTTATATTTATAGCA<br>TTTATTAGCTATTGATTGGTTAGACGGTTCA<br>ACGCGACATTTCTCAAATACAATACAACG<br>GTTTCGT |

**Supplemental Table 11.** List of qPCR primers and probes used in this study

| Gene name | Forward primer (5'→3')      | Reverse primer (5'→3')        | Probe                                                    | Exons |
|-----------|-----------------------------|-------------------------------|----------------------------------------------------------|-------|
| Lin28b    | CCAGTGGATGTATTTG<br>TACACCA | GCCTGTTACCCGTAT<br>TGACTC     | /6-FAM/AGAAGCTTG<br>/ZEN/AAAGAAGGAGAGC<br>CAGTG/3IABkFQ/ | 2-3   |
| Igf2bp1   | CTTGCTCACAGTTCTC<br>CACT    | CGTCTAGAGATTGAA<br>CACTCAGT   | /6-FAM/AGGCTATCT<br>/ZEN/AGCACTTCCCAT<br>CGGA/3IABkFQ/   | 2-4   |
| Igf2bp2   | ACCATCCTCTCACTGA<br>CATCT   | ACACATCAAACAGC<br>TCGCT       | /6-FAM/TGCCTCCAT<br>/ZEN/CAAGATTGCTCC<br>AGC/3IABkFQ/    | 12-13 |
| Igf2bp3   | CCAGCACCTCCCATTG<br>TAAG    | CGCTTTCAGGTAAAA<br>TGGAAC TAC | /6-FAM/CACTCGGTC<br>/ZEN/CCTAAACGGCAG<br>A/3IABkFQ/      | 1-4   |
| Pax5      | GCCTGTAGACACTAT<br>GCTGTG   | AGAGCGAGTCTGTG<br>ACAATG      | /6-FAM/TCCGAATGA<br>/ZEN/TCCTGTTGATGG<br>AGCTG/3IABkFQ/  | 3-5   |
| Arid3a    | CAACATGAACAGGTC<br>GAGGAC   | GACCCCAAGAGGAA<br>AGAGTTC     | /6-FAM/ACTGGAGTG<br>/ZEN/CCCCGCTTCTG/3IABkFQ/            | 4-5   |
| Hprt1     | CCCCAAAATGGTTAA<br>GGTTGC   | AACAAAGTCTGGCCT<br>GTATCC     | /6-JOEN/CTTGCTGGT<br>/ZEN/GAAAAGGACCTC<br>TCGAA/3IABkFQ/ | 5-6   |

Abbreviations or trademark names used:

6-FAM      6-carboxyfluorescein amidite

ZEN        internal ZEN™ quencher

JOEN       6-carboxy-4',5'-dichloro-2',7'-dimethoxyfluorescein NHS ester

3IABkFQ    3' Iowa Black® FQ

### **Supplemental Movie 1**

Physical co-localization between FH-LIN28A and endogenous Igf2bp3 in 220-8 pro-B cells was detected using proximity ligation assay (PLA) as described for Figure 2E. Confocal microscopy was used to visualize in situ the fluorescent foci from PLA (green) and DAPI staining (blue). 3D animation was generated using Imaris software (Bitplane) to demonstrate electronic rendering of nuclei (blue) and PLA signal (green dots), and their spatial arrangement in cytoplasm of representative cells.
